# Supplementary material
Source: Research Square preprint supplement (doi:10.21203/rs.3.rs-8805419/v1)
Supplement: Supplementary file 1 [file d433947c607a41673c2b288d.docx]

**Appendix**

Table A1. Pstest results (Patenting vs. non-patenting firms)

|  | Mean | | |  | t-test | |  |
| --- | --- | --- | --- | --- | --- | --- | --- |
| Variable | Treated | Control | %bias |  | t | p>|t| | V(T)/V(C) |
| Size | 8.36 | 8.24 | 8.70 |  | 1.41 | 0.16 | 1.09 |
| Age | 2.90 | 2.90 | -0.20 |  | -0.03 | 0.98 | 1.05 |
| Capital intensity | 0.21 | 0.20 | 1.50 |  | 0.25 | 0.80 | 1.06 |
| Leverage | 5.19 | 5.64 | -4.00 |  | -0.65 | 0.52 | 1.68* |
| Cash flow | 7.84 | 7.16 | 9.70 |  | 1.57 | 0.12 | 2.18* |

Table A2. Kolmogorov–Smirnov test results (Patenting vs. non-patenting firms)

| Variables | Combined Kolmogorov Smirnov D | P-value | Corrected |
| --- | --- | --- | --- |
| Size | 0.0521 | 0.482 | 0.451 |
| Age | 0.0193 | 1.00 | 1.00 |
| Capital intensity | 0.0444 | 0.687 | 0.659 |
| Leverage | 0.0405 | 0.788 | 0.765 |
| Cash flow | 0.0734 | 0.123 | 0.108 |

Figure A1. Quantile–quantile plots of the matching variables (Patenting vs. non-patenting firms)

Table A3. Pstest results (Green vs. non-green patenting firms)

|  | Mean | | |  | t-test | |  |
| --- | --- | --- | --- | --- | --- | --- | --- |
| Variable | Treated | Control | %bias |  | t | p>|t| | V(T)/V(C) |
| Size | 8.78 | 8.84 | -3.30 |  | -0.19 | 0.85 | 1.13 |
| Age | 2.99 | 2.96 | 5.00 |  | 0.28 | 0.78 | 0.94 |
| Capital intensity | 0.25 | 0.23 | 11.10 |  | 0.63 | 0.53 | 1.14 |
| Leverage | 3.61 | 4.12 | -14.70 |  | -0.84 | 0.40 | 1.1 |
| Cash flow | 8.89 | 8.20 | 9.80 |  | 0.56 | 0.58 | 2.59* |

Table A4. Kolmogorov–Smirnov test results (Green vs. non-green patenting firms)

| Variables | Combined Kolmogorov Smirnov D | P-value | Corrected |
| --- | --- | --- | --- |
| Size | 0.0923 | 0.945 | 0.92 |
| Age | 0.0615 | 1.00 | 1.00 |
| Capital intensity | 0.1077 | 0.845 | 0.796 |
| Leverage | 0.1231 | 0.708 | 0.641 |
| Cash flow | 0.1077 | 0.845 | 0.796 |

Figure A2. Quantile–quantile plots of the matching variables (Green vs. non-green patenting firms)
